# Supplementary material
Source: MDPI journal article supplement (https://www.mdpi.com/2410-387X/6/1/4)
Supplement: s1 [file s1]

## Supplementary Information for

“Network-compatible unconditionally secured classical key distribution via quantum superposition-induced deterministic randomness,” by

B. S. Ham

GIST, S. Korea

(bham@gist.ac.kr)

### Section A: Unitary transformation

Using equation (1), the following identity and inversion matrices are obtained for the round-trip of light in Fig. 1:

$$\begin{bmatrix} E_9 \\ E_{10} \end{bmatrix} = [\text{BH}] \begin{bmatrix} E_1 \\ 0 \end{bmatrix} = \frac{1}{2} \begin{bmatrix} -\{e^{i(\psi_2+\varphi_1)} + e^{i(\psi_1+\varphi_2)}\} & i\{e^{i(\psi_2+\varphi_1)} - e^{i(\psi_1+\varphi_2)}\} \\ i\{e^{i(\psi_1+\varphi_2)} - e^{i(\psi_2+\varphi_1)}\} & -\{e^{i(\psi_2+\varphi_1)} + e^{i(\psi_1+\varphi_2)}\} \end{bmatrix} \begin{bmatrix} E_1 \\ 0 \end{bmatrix}, \quad (\text{A1})$$

where  $[\text{BH}] = [\text{BS}][\psi_{1,2}][\text{BS}][\varphi_{1,2}][\text{BS}]$ . The matrices  $[\text{BS}]$ ,  $[\psi_{1,2}]$ , and  $[\varphi_{1,2}]$  are respectively for the beam splitter, the phase controllers  $\Psi_i$ , and  $\Phi_i$  in the MZI:

$$[\text{BS}] = \frac{1}{\sqrt{2}} \begin{bmatrix} 1 & i \\ i & 1 \end{bmatrix}, \quad (\text{A2})$$

$$[\psi_{1,2}] = \begin{bmatrix} e^{i\psi_2} & 0 \\ 0 & e^{i\psi_1} \end{bmatrix}, \quad (\text{A3})$$

$$[\varphi_{1,2}] = \begin{bmatrix} e^{i\varphi_2} & 0 \\ 0 & e^{i\varphi_1} \end{bmatrix}. \quad (\text{A4})$$

For the round-trip MZI in Fig. 1, equation (A1) satisfies unitary transformation if  $\psi_1 + \varphi_2 = \psi_2 + \varphi_1$  is satisfied:

$$\begin{aligned} \begin{bmatrix} E_9 \\ E_{10} \end{bmatrix} &= \frac{1}{2} \begin{bmatrix} -\{e^{i(\psi_1+\varphi_2)} + e^{i(\psi_1+\varphi_2)}\} & i\{e^{i(\psi_1+\varphi_2)} - e^{i(\psi_1+\varphi_2)}\} \\ i\{e^{i(\psi_1+\varphi_2)} - e^{i(\psi_1+\varphi_2)}\} & -\{e^{i(\psi_1+\varphi_2)} + e^{i(\psi_1+\varphi_2)}\} \end{bmatrix} \begin{bmatrix} E_1 \\ 0 \end{bmatrix}, \\ &= -e^{i(\psi_1+\varphi_2)} \begin{bmatrix} 1 & 0 \\ 0 & 1 \end{bmatrix} \begin{bmatrix} E_1 \\ 0 \end{bmatrix}. \end{aligned} \quad (\text{A5})$$

Owing to the unitary transformation in equation (A1), deterministic key distribution is confirmed, where eavesdropping is random due to MZI superposition.

### Section B: Determinacy of NC-USCKD

(I) Identity relation:

From equation (A5),  $E_9 = cE_1$  and  $E_{10} = 0$  result in for the identity matrix of  $[\text{BH}]$ , where  $c$  is a global phase factor. Because  $\varphi_1, \psi_1 \in \{0, \pi\}$  and  $\varphi_1 = \psi_1$  for the identity relation in USCKD (see ref. 21), the following relation is achieved for the address phase:

$$\psi_2 = \varphi_2. \quad (\text{B1})$$

Unlike phase bases  $\psi_1$  and  $\varphi_1$  having two discrete orthogonal bases of 0 and  $\pi$ , equation (B1) has no restriction. Thus, the values of  $\psi_2$  and  $\varphi_2$  are continuous:  $0 \leq (\psi_2, \varphi_2) \leq \pi$ . With the phase-shifted controls of  $\psi_2$  and  $\varphi_2$  working for the addressable networking in NC-USCKD, the condition of  $\varphi_1 = \psi_1$  is also required for the MZI directionality (see Fig. 2).

(II) Inversion relation:

To satisfy the inversion relation ( $E_9 = 0$  and  $E_{10} = c'E_1$ ) in equation (A1), the exponent of each matrix element in [BH] must be  $(\psi_2 + \varphi_1) = (\psi_1 + \varphi_2) \pm \pi$ :

$$\begin{aligned} \begin{bmatrix} E_9 \\ E_{10} \end{bmatrix} &= \frac{1}{2} \begin{bmatrix} -\{e^{i(\psi_1+\varphi_2)} - e^{i(\psi_1+\varphi_2)}\} & i\{e^{i(\psi_1+\varphi_2)} + e^{i(\psi_1+\varphi_2)}\} \\ i\{e^{i(\psi_1+\varphi_2)} + e^{i(\psi_1+\varphi_2)}\} & -\{e^{i(\psi_1+\varphi_2)} - e^{i(\psi_1+\varphi_2)}\} \end{bmatrix} \begin{bmatrix} E_1 \\ 0 \end{bmatrix}, \\ &= \pm i e^{i(\psi_1+\varphi_2)} \begin{bmatrix} 0 & 1 \\ 1 & 0 \end{bmatrix} \begin{bmatrix} E_1 \\ 0 \end{bmatrix}. \end{aligned} \quad (\text{B2})$$

Because  $\varphi_1, \psi_1 \in \{0, \pi\}$  and  $\varphi_1 = \psi_1 \pm \pi$  are for the condition of inversion matrix in USCKD (see Fig. 3), the following relation is required:

$$\psi_2 = \varphi_2. \quad (\text{B4})$$

Therefore, the same address phase relation obtained in equations (B1) and (B4) is universal for NC-USCC whether it is for the identity or inversion matrix in the unitary transformation. For the key distribution process as shown in Table 2 for Fig. 1 in the main text, Alice randomly selects her phase basis  $\psi_1$  to be either identical or opposite to the Bob's choice. If Alice's phase choice is for identical (opposite),  $\psi_1 = \varphi_1$  ( $\psi_1 = \varphi_1 \pm \pi$ ), it results in the identity (inversion) relation of equation (A5) regardless of the address set if  $\psi_2 = \varphi_2$  is satisfied. As a result, any value of the address set  $(\varphi_2, \psi_2)$  fulfills the unitary transformation in Fig. 1 satisfying NC-USCKD for the unconditional security due to deterministic randomness, resulting in infinite number of addresses. This confirms that the addressable networking of NC-USCKD with continuous phase basis or addressing.

**Section C:**

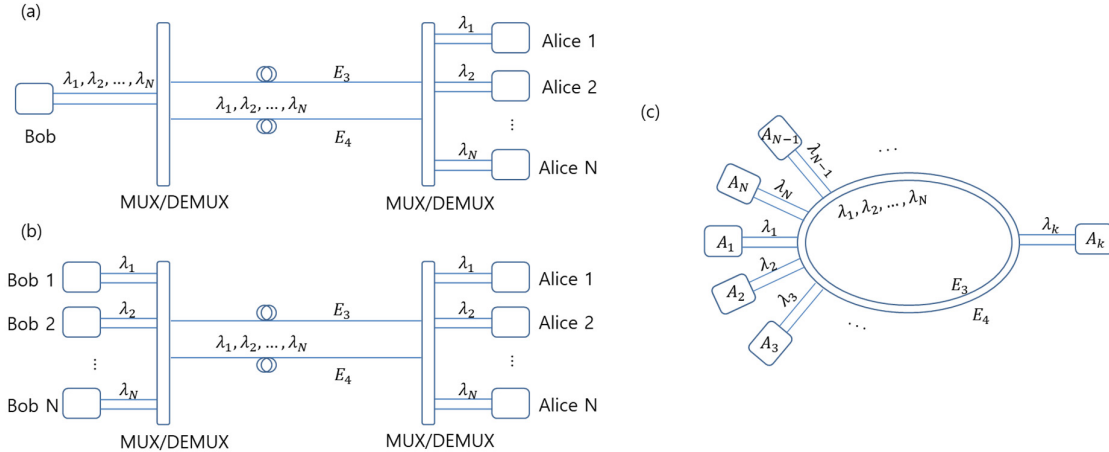

FIG. C1. Schematics of (a) 1xN, (b) NxN, and (c) ring configuration for NA-USCKD. The  $\lambda_i$  corresponds to  $\varphi_2^i$  and  $\psi_2^i$ . In (c), each party is attached by ADD/DROP multiplexer.

Figure C1 shows potential network configurations of the addressable NC-USCKD, where the control phase  $\varphi_2$  in Fig. 3 is assigned to the wavelength  $\lambda$  in the DWDM networks.

#### Section D: Channel measurement randomness

The matrix representation for the  $\psi_1$  –controlled return light by Alice is denoted by (see equation (5) in the main text):

$$\begin{aligned}
 \begin{bmatrix} E_7 \\ E_8 \end{bmatrix} &= \frac{1}{2\sqrt{2}} [\psi_{1,2}] [BS] [BS] [\varphi_{1,2}] [BS] \begin{bmatrix} E_1 \\ 0 \end{bmatrix} \\
 &= \frac{1}{2\sqrt{2}} \begin{bmatrix} e^{i\psi_2} & 0 \\ 0 & e^{i\psi_1} \end{bmatrix} \begin{bmatrix} 1 & i \\ i & 1 \end{bmatrix} \begin{bmatrix} 1 & i \\ i & 1 \end{bmatrix} \begin{bmatrix} e^{i\varphi_2} & 0 \\ 0 & e^{i\varphi_1} \end{bmatrix} \begin{bmatrix} 1 & i \\ i & 1 \end{bmatrix} \begin{bmatrix} E_1 \\ 0 \end{bmatrix} \\
 &= \frac{1}{\sqrt{2}} \begin{bmatrix} -e^{i(\psi_2+\varphi_1)} & ie^{i(\psi_2+\varphi_1)} \\ ie^{i(\psi_1+\varphi_2)} & -e^{i(\psi_1+\varphi_2)} \end{bmatrix} \begin{bmatrix} E_1 \\ 0 \end{bmatrix}. \tag{D1}
 \end{aligned}$$

According to identity conditions in Appendices A and B, equation (D1) results in  $|E_7| = |E_8|$ , representing measurement indistinguishability in the channels by Eve (see Fig. 4). The background of this complete randomness is in the MZI path superposition corresponding to the no-cloning theorem in QKD.

#### Section E: Unconditional security of NC-USCKD

Table E1 shows a key distribution procedure using identity relation only for the present NC-USCKD. The technical difference between Table 2 and Table E1 is in the key distribution strategy whether bit-by-bit network initialization is used or bit-by-bit sifting is used, resulting in only different bit rate for the key generation. As discussed with identity relation in USCKD [21], any inverted key is discarded but used for network monitoring: see the bold X in Table E1. In the present NC-USCKD using two phase bases, the key generation rate is less than 50%. Before the key distribution in Table E1, a network initialization step is necessary for authentication between two addressees assigned by  $\varphi_2$  and  $\psi_2$ . The key distribution procedure is as follows:

1. Bob randomly selects his phase basis  $\varphi_1 \in \{0, \pi\}$  to prepare a key and sends it to Alice.
2. Bob converts the chosen basis  $\varphi_1$  into a key record:  $x \in \{0, 1\}$ ; if  $\varphi_1 = 0$ ,  $x=0$ ; if  $\varphi_1 = \pi$ ,  $x=1$ .
3. Alice measures her visibility  $V_A$  and keeps the record.
4. Alice copies the Bob's key for her record  $y$ : if  $V_A=1$ ,  $y=0$ ; if  $V_A=-1$ ,  $y=1$ ; if  $V_A \neq \pm 1$ ,  $y=V_A$  (error).
5. Alice randomly selects her phase basis  $\psi_1 \in \{0, \pi\}$ , encode the return light, and sends it back to Bob.
6. Alice converts the chosen basis  $\psi_1$  into the key record  $z$ :  $z \in \{0, 1\}$ ; if  $\psi_1 = 0$ ,  $z=0$ ; if  $\psi_1 = \pi$ ,  $z=1$ .
7. Alice compares  $y$  and  $z$  for the raw key  $m_A$ :  $m_A = (y + z)$  at modulus 2. If  $m_A \neq 0$ , discard it, otherwise  $m_A = z$ .
8. Bob measure his visibility  $V_B$ .
9. Bob converts  $V_B$  into his raw key  $m_B$ . If  $V_B = -1$ ,  $m_B = x$ , otherwise discard it.
10. Alice and Bob publically announce their error bits and discard them from their raw key list to set a final key,  $m$ .

Table E1. A key distribution procedure for unconditional security. The phase  $\varphi_1$  is denoted without addition of  $\varphi_2$ . The mark 'X' indicates a discarded bit due to unsatisfied identity relation. The red 'X' indicates error corrections. Privacy amplification is not shown.

| Party | Order    |                              | 1     | 2  | 3     | 4     | 5     | 6     | 7  | 8     | 9     | 10 | set       |
|-------|----------|------------------------------|-------|----|-------|-------|-------|-------|----|-------|-------|----|-----------|
|       | Sequence |                              |       |    |       |       |       |       |    |       |       |    |           |
| Bob   | 1        | $\varphi_1$                  | 0     | 0  | $\pi$ | 0     | $\pi$ | $\pi$ | 0  | $\pi$ | 0     | 0  |           |
|       | 2        | Prepared key: $x(\varphi_1)$ | 0     | 0  | 1     | 0     | 1     | 1     | 0  | 1     | 0     | 0  | $\{x\}$   |
|       | 8        | $V_B$                        | 1     | -1 | 0.9   | 1     | -1    | -1    | -1 | 1     | 1     | -1 |           |
|       | 9        | raw key                      | X     | 0  | X     | X     | 1     | 1     | 0  | X     | X     | 0  | $\{m_B\}$ |
|       | 10       | Final key                    | X     | 0  | X     | X     | 1     | X     | 0  | X     | X     | 0  | $\{m\}$   |
| Alice | 3        | $V_A$                        | 1     | 1  | -1    | 1     | -1    | -0.8  | 1  | -1    | 1     | -1 |           |
|       | 4        | Copy x: y                    | 0     | 0  | 1     | 0     | 1     | -0.8  | 0  | 1     | 0     | 0  | $\{y\}$   |
|       | 5        | $\psi_1$                     | $\pi$ | 0  | 0     | $\pi$ | $\pi$ | $\pi$ | 0  | 0     | $\pi$ | 0  |           |
|       | 6        | $z(\psi_1)$                  | 1     | 0  | 0     | 1     | 1     | 1     | 0  | 0     | 1     | 0  | $\{z\}$   |
|       | 7        | raw key                      | X     | 0  | X     | X     | 1     | X     | 0  | X     | X     | 0  | $\{m_A\}$ |
|       | 10       | Final key                    | X     | 0  | X     | X     | 1     | X     | 0  | X     | X     | 0  | $\{m\}$   |

#### Section F:

For a given n-bit long key whose basis is binary, the maximum number of representation is  $2^n$ . For n=128, the total number of representation is  $2^{128} = 3.4 \times 10^{38}$ . Recalling the universe age is  $1.38 \times 10^{10}$  years or  $4.35 \times 10^{17}$  seconds, the eavesdropping chance for the 128-bit long key by using the most powerful supercomputer (IBM Summit) whose performance is  $1.43 \times 10^{17}$  flops/s is as follows:

$$\eta = \frac{6.2 \times 10^{34}}{3.4 \times 10^{38}} = 1.8 \times 10^{-4}, \quad (F1)$$

where  $6.2 \times 10^{34}$  is from the universe age  $(1.43 \times 10^{17})(4.35 \times 10^{17})$ . The eavesdropping rate in equation (F1) results in unconditional security based on perfect randomness of MZI path superposition. Even with a personal computer whose operating system is 64-bit based, the brute force attack for the randomness in USCC takes more than 100 seconds:  $2^{64} = 1.8 \times 10^{19}$ . This means that the proposed NC-USCC is effective even with personal computers for the applications of the one-time-pad cryptography, where the key never be reused and the key distribution speed can be close to the optoelectronics speed or CPU speed at ~GHz. The flight time  $\Delta t$  of a light pulse for a 10 km optical fiber is as follows:

$$\Delta t = n \frac{1 \times 10^4}{3 \times 10^8} = 5 \times 10^{-5} \text{ (s)},$$

where n is the refractive index of the optical fiber,  $n \sim 1.5$ . In the round-trip MZI scheme of Fig. 1 may limit its operational bandwidth if the bit-by-bit network initialization is used at less than MHz for each channel. Needless to say, this channel-bandwidth bottleneck can also be solved by multi-channel configuration such as in current fiber-optic communications networks.
